# Supplementary material for: Arsinous acid as a thiol binding group: potential cysteine peptide tagging functionality that binds a single thiol
Source: Royal Society of Chemistry journal article supplement (doi:10.1039/c3nj01462b), 2014-01-01

## Supporting Information

### **Arsinous Acid as a Thiol Binding Group: Potential Cysteine Peptide Tagging Functionality that Binds a Single Thiol.**

Xiaofei Liang and Dale G. Drueckhammer\*

*Department of Chemistry, Stony Brook University, Stony Brook, NY 11794-3400*

*dale.drueckhammer@stonybrook.edu*

**New Journal of Chemistry**

$^1\text{H-NMR}$  (300 MHz,  $\text{CDCl}_3$ ) of **8**

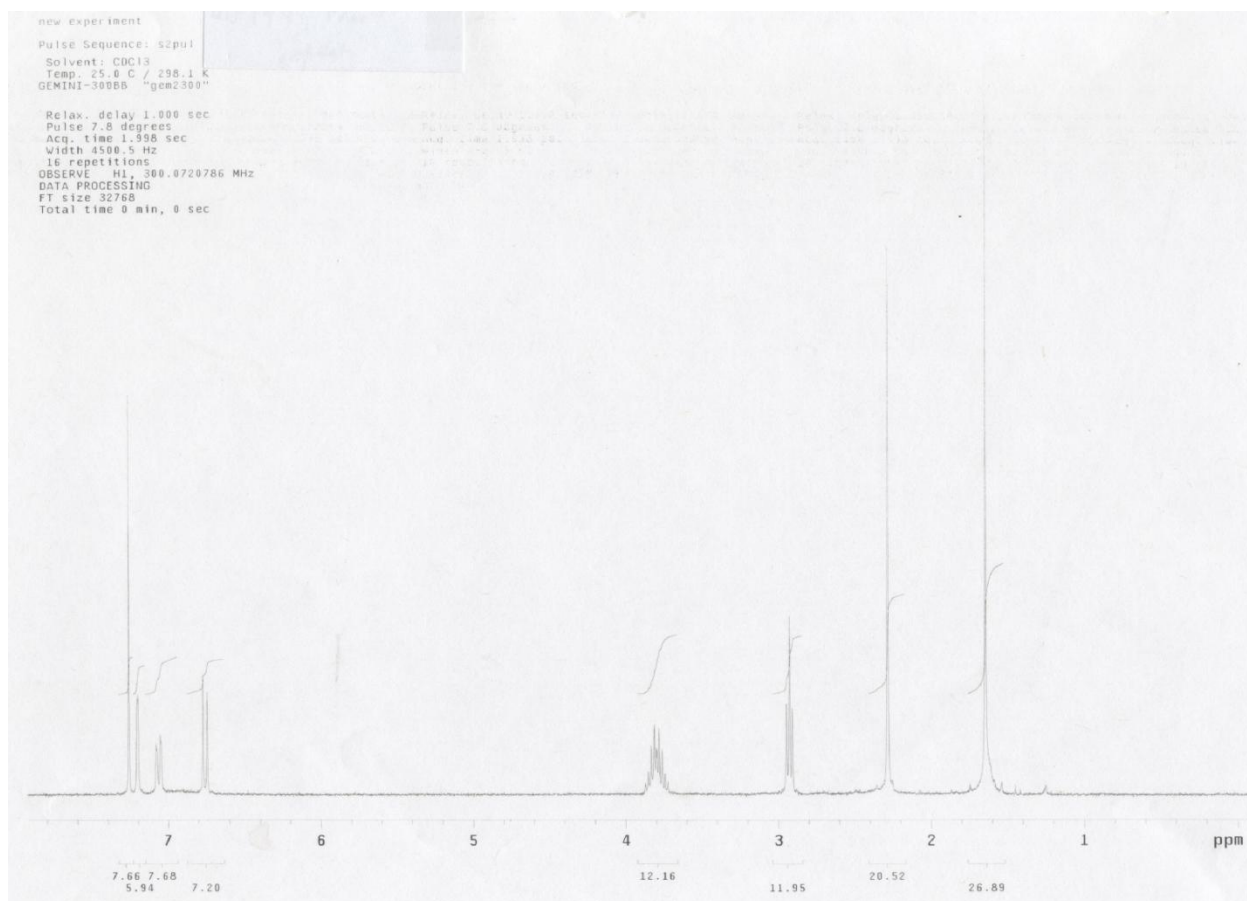

$^1\text{H-NMR}$  (300 MHz,  $\text{D}_2\text{O} + \text{DMSO-d}_6$ ) of **9** + pinacol

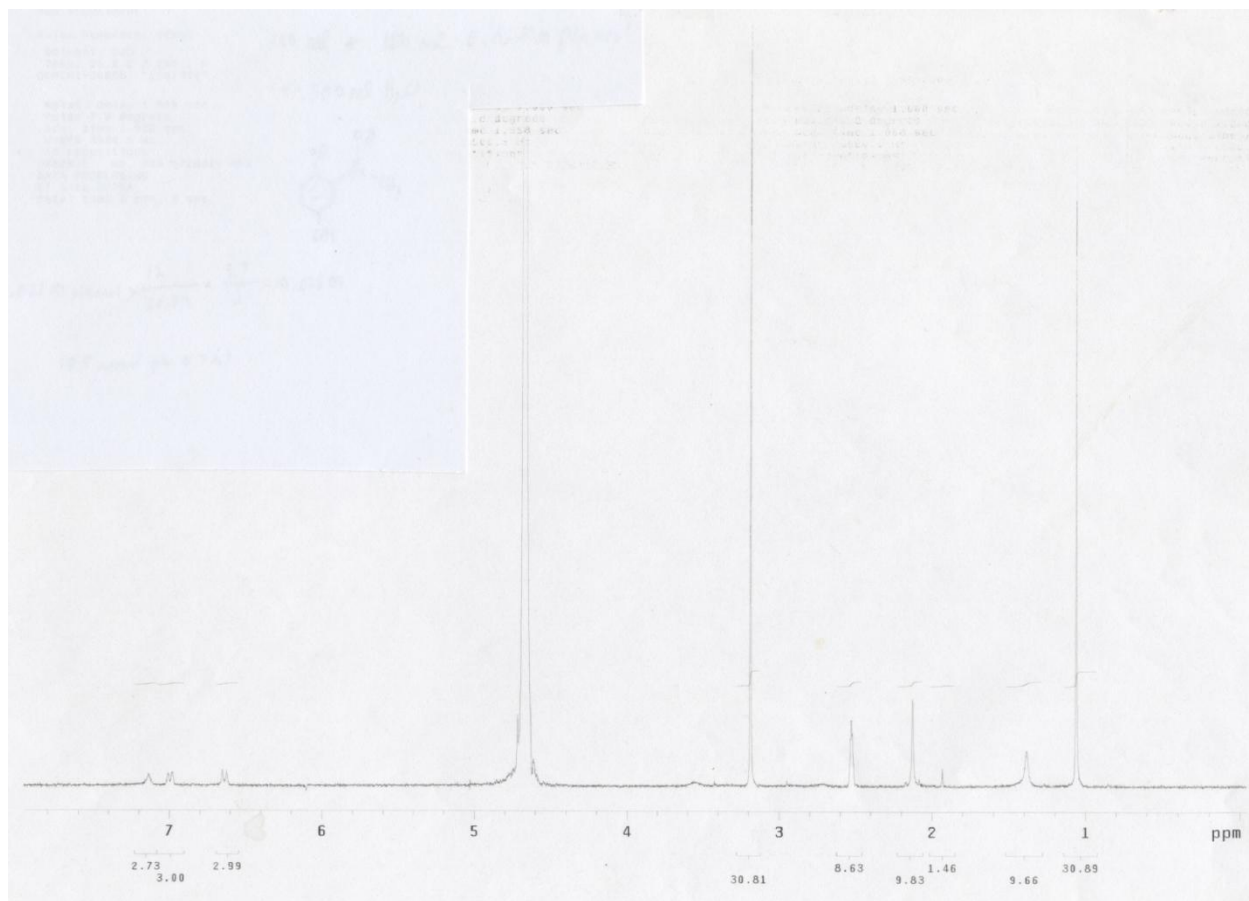

Supplement: c3nj01462b.pdf [file c3nj01462b.pdf]
